# Supplementary material for: Usefulness of Perioperative Laboratory Tests in Total Hip and Knee Arthroplasty: Are They Necessary for All Patients?
Source: PubMed Central journal article supplement — Arthroplast Today. 2021 Jan 30;7:136–42. doi: 10.1016/j.artd.2020.12.001 (PMC7850936; doi:10.1016/j.artd.2020.12.001), 2021-01-30
Supplement: mmc1.pdf [file mmc1.pdf]

# INDIVIDUAL CONFLICT OF INTEREST STATEMENT

## *American Association of Hip and Knee Surgeons*

(Adopted from the American Academy of Orthopaedic Surgeons disclosure statement)

The following form **must be filled out completely and submitted by each author (example, 6 authors, 6 forms).**  
**All items require a response. If there is no relevant disclosure for a given item, enter "None."**

---

**Manuscript Title:** Usefulness of Perioperative Lab Tests in Total Hip and Knee Arthroplasty: Are They Necessary for All Patients?

1. Royalties from a company or supplier (The following conflicts were disclosed)

DePuy, A Johnson & Johnson Company

2. Speakers bureau/paid presentations for a company or supplier (The following conflicts were disclosed)

Corin U.S.A, DePuy, A Johnson & Johnson Company

3A. Paid employee for a company or supplier (The following conflicts were disclosed)

None

3B. Paid consultant for a company or supplier (The following conflicts were disclosed)

Corin U.S.A, DePuy, A Johnson & Johnson Company

3C. Unpaid consultants for a company or supplier (The following conflicts were disclosed)

None

4. Stock or stock options in a company or supplier (The following conflicts were disclosed)

Corin U.S.A, Joint Vue

5. Research support from a company or supplier as a Principal Investigator (The following conflicts were disclosed)

DePuy, A Johnson & Johnson Company, Porter Adventist Hospital

6. Other financial or material support from a company or supplier (The following conflicts were disclosed)

None

7. Royalties, financial or material support from publishers (The following conflicts were disclosed)

Wolters Kluwer Health – Lippincott Williams & Wilkins

8. Medical/Orthopaedic publications editorial/governing board (The following conflicts were disclosed)

CORR, JOA, JBJS, Orthopedics Today

9. Board member/committee appointments for a society (The following conflicts were disclosed)

None

**Each author must sign AND print or type his/her name, date and submit a separate form**

In addition, one BLINDED Conflict of Interest form (no author names used) should be submitted per manuscript with all author disclosures.

Douglas Dennis, MD



Author Name (Print or Type)

Author Signature

1/29/2020

Date
